# Supplementary figures and images for: Ultra-Processed Food Consumption Associated with Incident Hypertension among Chinese Adults—Results from China Health and Nutrition Survey 1997–2015
Source: MDPI journal article supplement (doi:10.3390/nu14224783), 2022-11-11

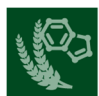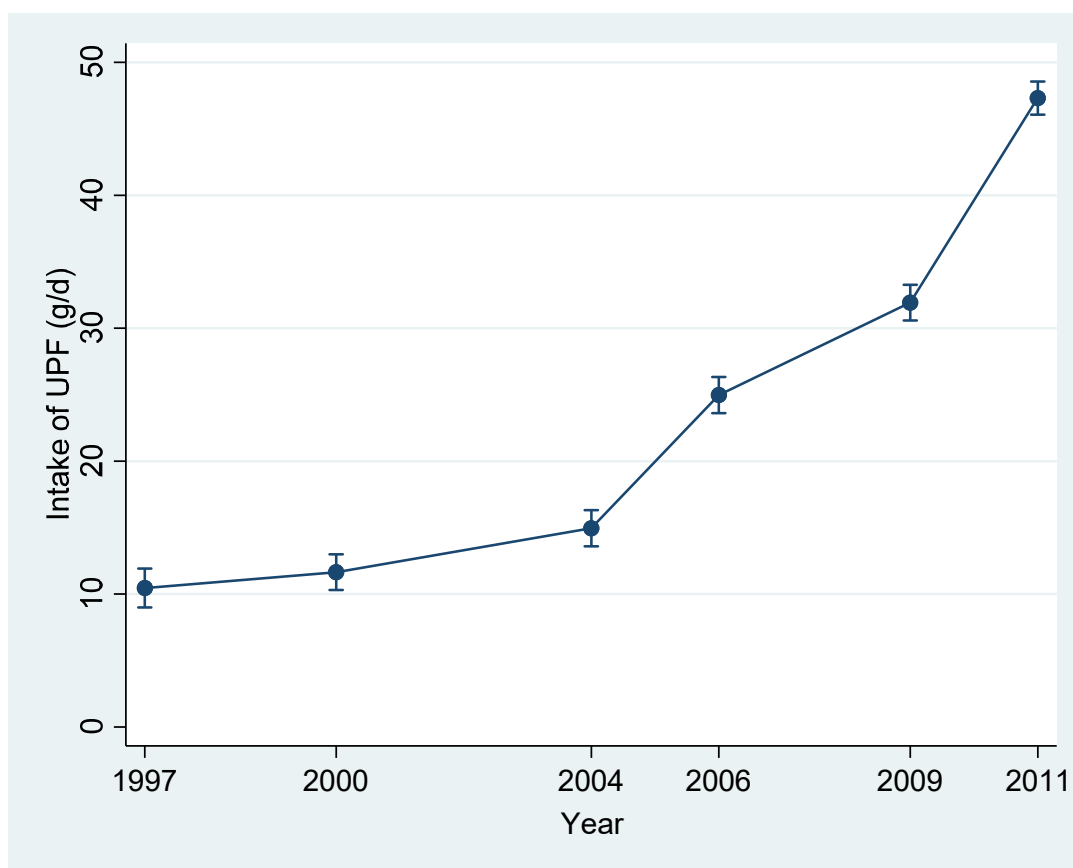

**Supplementary Figure S1.** Age- and sex-adjusted mean intake of UPF in 1997-2011 ( $n = 15,054$ ).

Supplement: s1 [file s1]
